# Supplementary material for: Toll-like receptor 4-mediated necroptosis in the development of necrotizing enterocolitis
Source: PubMed Central journal article supplement (PMC8770135; doi:10.1038/s41390-021-01457-y), 2021-03-17
Supplement: 41390_2021_1457_MOESM1_ESM.pdf [file 41390_2021_1457_MOESM1_ESM.pdf]

**Supplementary Table 1 Demographic characteristics of the study population**

|                                    | NEC (n=8)      | CIA (n=8)      | P value |
|------------------------------------|----------------|----------------|---------|
| Gestational age (week),<br>Mean±SD | 28.68±1.16     | 28.75±1.20     | 0.904   |
| Birth weight (g),<br>Mean±SD       | 1093.75±146.83 | 1105.63±124.32 | 0.864   |
| Days after birth                   | 19.75±4.98     | 8.63±4.03      | 0.0002  |

NEC: necrotizing enterocolitis; CIA: congenital intestinal atresia.

**Supplementary Table 2 Primer sequences used for real-time PCR.**

| Primer name        | Forward (5' - 3')     | Reverse (3' - 5')       |
|--------------------|-----------------------|-------------------------|
| mouse IL1 $\beta$  | CCAAAAGATGAAGGGCTGCT  | ACAGAGGATGGGCTCTTCTT    |
| mouse IL6          | CCTCTGGTCTTCTGGAGTACC | ACTCCTTCTGTGACTCCAGC    |
| mouse IL10         | ATAACTGCACCCACTTCCCA  | GGGCATCACTTCTACCAGGT    |
| mouse IL17         | TCTCCACCGCAATGAAGACC  | CACACCCACCAGCATCTTCT    |
| mouse TNF $\alpha$ | ATGAGCACAGAAAGCATGA   | AGTAGACAGAAGAGCGTGGT    |
| mouse IFN $\gamma$ | TTCTTCAGCAACAGCAAGGC  | TCAGCAGCGACTCCTTTTCC    |
| mouse MCP1         | GCTCAGCCAGATGCAGTTAA  | TCTTGAGCTTGGTGACAAAAACT |
| mouse p65          | GGAGGGAGTTTGGCTCTTTC  | CAGTCAGCCATCAGGTGCTA    |
| mouse B2M          | CGGCCTGTATGCTATCCAGA  | GGGTGAATTCAGTGTGAGCC    |
